# Supplementary material for: Shenzhen stroke emergency map improves access to rt-PA for patients with acute ischaemic stroke
Source: PubMed Central journal article supplement — Stroke Vasc Neurol. 2019 Jun 21;4(3):115–22. doi: 10.1136/svn-2018-000212 (PMC6812643; doi:10.1136/svn-2018-000212), 2019-06-21
Supplement: svn-2018-000212supp001.pdf [file svn-2018-000212supp001.pdf]

**Certification criteria for qualified local hospitals of Shenzhen stroke emergency map**

| <b>Evaluation project</b>                  | <b>NO</b> | <b>Evaluation elements</b>                                                                                                                                                                                                                                                    | <b>Score</b> | <b>Scoring standard</b>                                                                                                                                                              |
|--------------------------------------------|-----------|-------------------------------------------------------------------------------------------------------------------------------------------------------------------------------------------------------------------------------------------------------------------------------|--------------|--------------------------------------------------------------------------------------------------------------------------------------------------------------------------------------|
| Qualification of medical institutions (10) | 1         | Tertiary comprehensive hospital, tertiary specialist hospital, city 1-2-0 network hospitals                                                                                                                                                                                   | 10.0         | Third-grade class-A hospital score 8 points; Grading tertiary hospitals score 7 points; un-grading tertiary hospital score 6 points.<br>City 1-2-0 network hospitals score 2 points. |
| Department settings (10)                   | 1         | Emergency department, neurology, neurosurgery, intensive care unit, anesthesiology, imaging department(neuroimaging), clinical laboratory, rehabilitation department.                                                                                                         | 10.0         | Deduct 2 points for each department missing.                                                                                                                                         |
| Infrastructure (15)                        | 1         | Equip with electrocardiogram, electrocardiogram monitor, defibrillator, recovery equipment, oxygen, drugs, etc.<br>Communication equipment for ambulances such as GPS , vehicle-mounted information transmission system, wireless interphone, vehicle-mounted telephone, etc. | 3.0          | Deduct 1 point for each equipment missing.                                                                                                                                           |
|                                            | 2         | Equip with CT(24h/7d ), emergency examination ( 24h/7d ), MRI, ultrasound ( transcranial Doppler ) and other necessary equipment                                                                                                                                              | 4.0          | Deduct 1 point for each equipment missing.                                                                                                                                           |

|                                                     |   |                                                                                                                                                                                                                                                                               |     |                                                                                                                                              |
|-----------------------------------------------------|---|-------------------------------------------------------------------------------------------------------------------------------------------------------------------------------------------------------------------------------------------------------------------------------|-----|----------------------------------------------------------------------------------------------------------------------------------------------|
|                                                     | 3 | Set up observation room or rescue room for stroke patients in emergency department or neurology department. Equip with acute stroke treatment bag (include rt-PA or urokinase ), examination tools, evaluation forms and necessary drugs in observation room or rescue room.  | 5.0 | Deduct 1 point for each equipment missing.                                                                                                   |
|                                                     | 4 | Establish a data transmission system that can transmit and receive medical information such as electrocardiogram and head CT images. Equip with nerve interventional therapy room and related equipment.                                                                      | 3.0 | Deduct 1 point for no data transmission system; Deduct 2 point for no equipment with nerve interventional therapy room and related equipment |
| Staffing (15)                                       | 1 | Stroke team includes neurologists, neurosurgeons, emergency physicians, specialist nurses, etc.( 24h/7d duty )                                                                                                                                                                | 5.0 | Deduct 5 points for no stroke team (24/7 duty); Deduct 2 points for no 24/7 duty; Deduct 1 point for each staff missing.                     |
|                                                     | 2 | At least one neurologist and neurosurgeon (deputy chief physician or chief physician) have received specialized training of cerebrovascular disease diagnostic and treatment techniques.                                                                                      | 5.0 | Deduct 2.5 points for each related staff missing.                                                                                            |
|                                                     | 3 | Staff with specialized training: neuroradiologists, anesthesiologists, neurointerventional physicians, nursing staff, neurorehabilitation specialists, ultrasound doctors (carotid ultrasound, transcranial Doppler , echocardiography), etc.                                 | 5.0 | Deduct 1 point for each staff missing.                                                                                                       |
| Programs to diagnose and treat stroke patients (40) | 1 | Door to perform NIHSS scale and physician assessment $\leq 10$ minutes; Door to stroke team $\leq 15$ minutes; Door to CT initiation and interpretation $\leq 30$ minutes; Door to laboratory result $\leq 30$ minutes(blood routine, serum biochemistry, coagulation tests). | 4.0 | Deduct 1 point for each non-compliance item.                                                                                                 |

|   |                                                                                                                                                                                                                                                                                                                                                                                                                                      |      |                                                                                                                                                                                                                                                                                                                                                                                                  |
|---|--------------------------------------------------------------------------------------------------------------------------------------------------------------------------------------------------------------------------------------------------------------------------------------------------------------------------------------------------------------------------------------------------------------------------------------|------|--------------------------------------------------------------------------------------------------------------------------------------------------------------------------------------------------------------------------------------------------------------------------------------------------------------------------------------------------------------------------------------------------|
| 2 | Diagnostic techniques: MRI, MRA, CTA, CTP, DSA, transesophageal echocardiography, TCD foaming test.                                                                                                                                                                                                                                                                                                                                  | 4.0  | Deduct 1 point for each technique missing.                                                                                                                                                                                                                                                                                                                                                       |
| 3 | Thrombolysis capable and DNT $\leq$ 60 minutes; Only thrombolysis-capable hospitals transfer patients with suspected LVO to thrombectomy-capable hospitals after performing thrombolysis (DIDO times <30 minutes) .                                                                                                                                                                                                                  | 8.0  | Deduct 5 point for DNT>60 minutes;<br>Deduct 3 point for delay of transfer.                                                                                                                                                                                                                                                                                                                      |
| 4 | Use antiplatelet drug, antihypertensive drug and statins according to guidelines; Prevent complications, including aspiration pneumonia, deep vein thrombosis, gastrointestinal haemorrhage, etc; Perform rehabilitation assessments and treatments (physical therapy, occupational therapy and speech therapy); Perform patient education; Perform surgery, including hematoma removal, decompressive craniectomy, ventriculostomy. | 4.0  | Deduct 1 point for each item missing.                                                                                                                                                                                                                                                                                                                                                            |
| 5 | The number of hospitalization AIS cases in the past 1 year $\geq$ 100;<br>The number of thrombolysis cases in the past $\geq$ 30 / $\geq$ 20 per year;<br>The number of endovascular therapy cases $\geq$ 20 in the past / $\geq$ 10 per year                                                                                                                                                                                        | 20.0 | The number of hospitalization AIS cases in the past 1 year $\geq$ 100 score 5 points and deduct 1 point for each 10 cases less; The number of thrombolysis cases < 10 in the past / 5 per year deduct 10 points, and 1 point will be added for every additional 10 cases. The number of endovascular therapy cases < 10 in the past / 5 per year deduct 10 points, and 1 point will be added for |

|                           |   |                                                                                                                                                                                                                       |     |                                                                                                                                                                                                                                                                     |
|---------------------------|---|-----------------------------------------------------------------------------------------------------------------------------------------------------------------------------------------------------------------------|-----|---------------------------------------------------------------------------------------------------------------------------------------------------------------------------------------------------------------------------------------------------------------------|
|                           |   |                                                                                                                                                                                                                       |     | every additional 2 cases.                                                                                                                                                                                                                                           |
| Management system<br>(10) | 1 | Establish stroke fast track (Green Channel); The director of the hospital serve as the leader of leading group; Continued quality improvement team consist of relevant department director and head nurse.            | 5.0 | No establishment of stroke fast track score 0 point; Deduct 3 points for no hospital leader serving as the leader of leading group; Deduct 0.5 point for each relevant department director and head nurse who do not involve in continued quality improvement team. |
|                           | 2 | Stroke management system and responsibility system; Thrombolysis workflow; Acute stroke thrombolysis and interventional surgery register; Keep the informed consent form for thrombolysis and interventional surgery. | 2.0 | Deduct 1 point for each missing item and 0.5 point for each incomplete item; Lack of thrombolysis workflow score 0 point.                                                                                                                                           |
|                           | 3 | Acute stroke database for stroke registration and continuous quality improvement; Follow-up data.                                                                                                                     | 3.0 | Deduct 1 point for each item missing.                                                                                                                                                                                                                               |
| Total                     |   |                                                                                                                                                                                                                       | 100 |                                                                                                                                                                                                                                                                     |

**Abbreviations:** GPS= Global Positioning System, 24h/7d= 24 hours per day, 7 days per week, MRI= Magnetic Resonance Imaging, rt-PA= recombinant tissue plasminogen activator, CT=Computed Tomography, MRA= Magnetic Resonance angiography, CTA= Computed Tomography angiography, CTP= Computed Tomography perfusion, DSA= Digital subtraction angiography, TCD= transcranial Doppler, DIDO =door-in-door-out, ONT=onset-to-needle time, DNT=door-to-needle time, LVO =large vessel occlusion ,AIS= Acute ischemic stroke.
